# Supplementary material for: Molecule-like and lattice vibrations in metal clusters
Source: Royal Society of Chemistry journal article supplement (doi:10.1039/d1cp04708f), 2022-01-01
Supplement: d1cp04708f1.pdf [file d1cp04708f1.pdf]

## Supporting Information for the paper:

### Molecule-like and Lattice Vibrations in Metal Clusters

Krishnadas Kumaranchira Ramankutty,\* Huayan Yang, Ani Baghdasaryan,  
Jeremie Teyssier, Valentin Paul Nicu\* and Thomas Buerger\*

#### 1. General Experimental parameters used for ESI MS measurements

The sample solubilized in dichloromethane was analyzed by nano-electrospray high resolution mass spectrometry (nano-ESI-HRMS) with the following settings:

- QSTAR Pulsar (AB Sciex)
- nano-ESI voltage = -2600 kV and -2200 kV (negative),
- Curtain gas (N<sub>2</sub>) = 25 psi
- Declustering and focusing lenses: DP = -50 V, DP2 = -15 V, FP = -120 V
- Mass range:  $m/z$  100 – 12'000 (accumulation time = 1s) with external TOF calibration (Agilent)
- Bin = 1 (automatic signal smoothing)
- Data processing software: PeakView 2.2 (AB Sciex)

External TOF calibration was performed prior to sample analysis up to  $m/z$  2834. Mass accuracy above this value cannot be guaranteed.

## Supporting Information 1

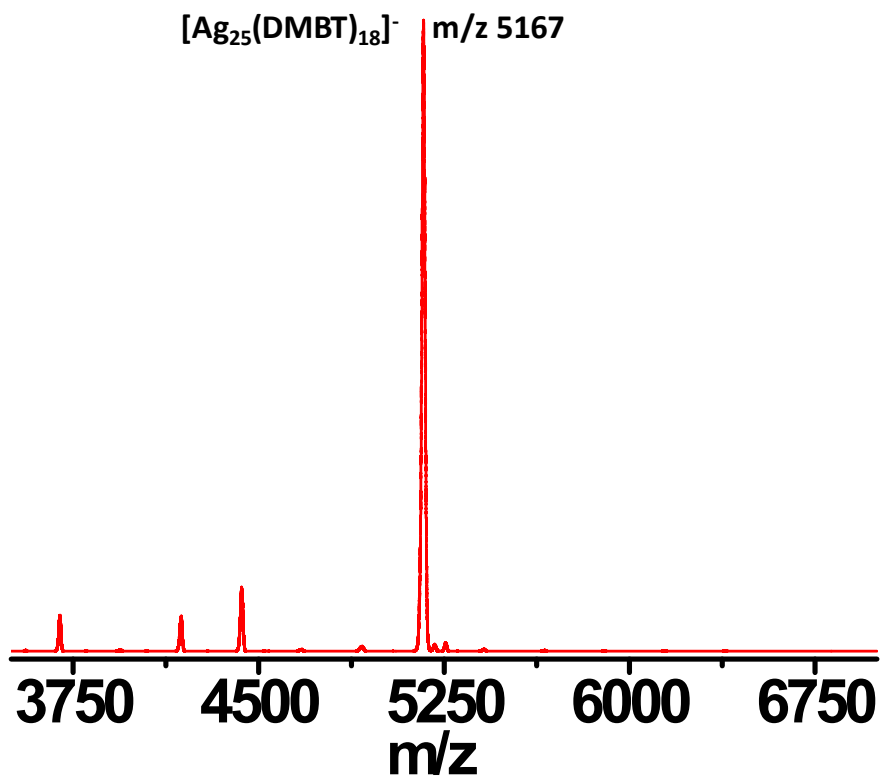

**Figure S1.** Negative ion mode ESI mass spectrum of  $[\text{Ag}_{25}(\text{DMBT})_{18}][\text{PPh}_4]$ . The bands in the lower m/z region are due to the fragments due to the sequential loss of the Ag-DMBT fragments from the molecular ion.

## Supporting Information 2

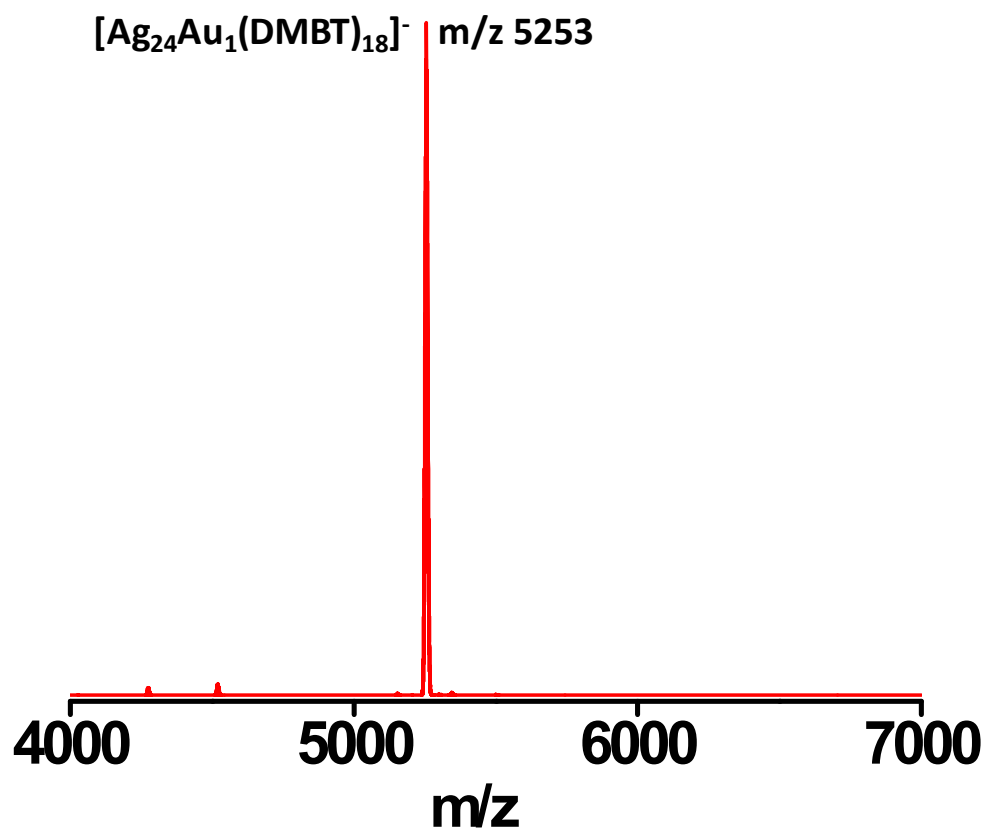

**Figure S2.** Negative ion mode ESI mass spectrum of  $[\text{Ag}_{24}\text{Au}_1(\text{DMBT})_{18}][\text{PPh}_4]$ . The bands in the lower m/z region are due to the fragments due to the sequential loss of the Ag-DMBT fragments from the molecular ion.

### Supporting Information 3

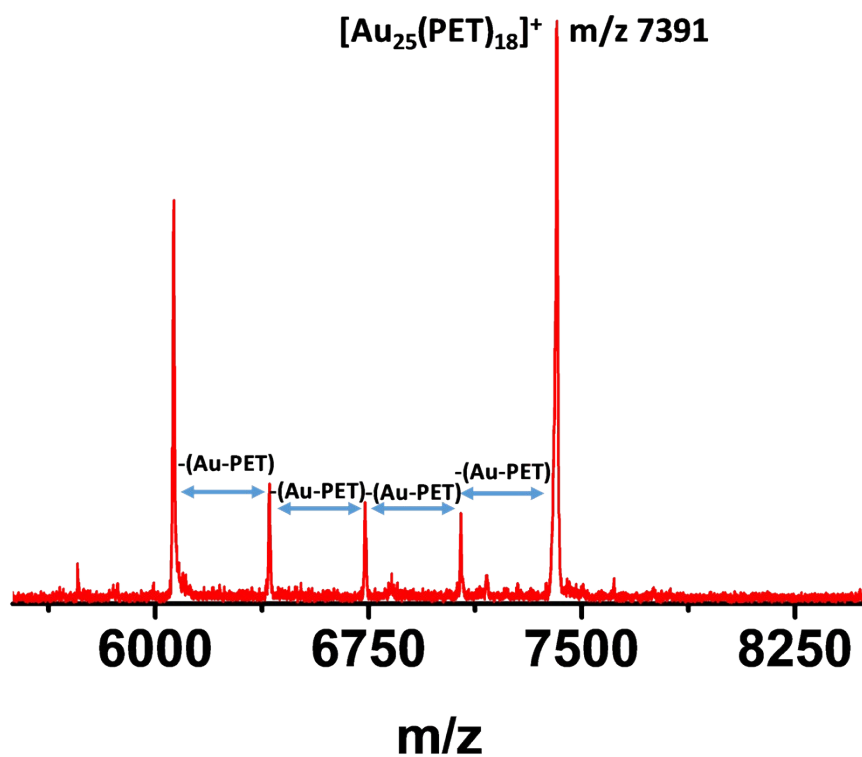

**Figure S3.** Positive ion mode MALDI mass spectrum of  $[\text{Au}_{25}(\text{PET})_{18}]$ . The bands in the lower m/z region are due to the fragments due to the sequential loss of the Au-PET fragments from the molecular ion, as labeled in the figure.

## Supporting Information 4

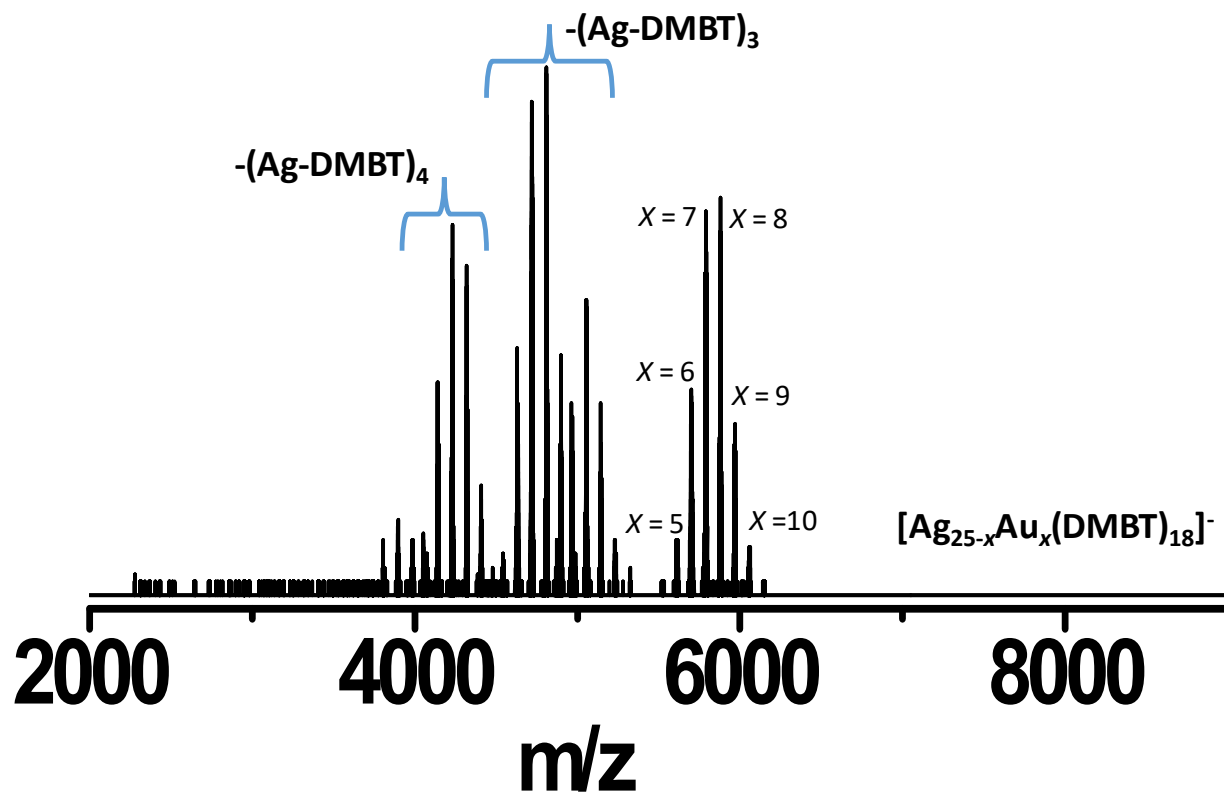

**Figure S4.** Negative ion mode MALDI mass spectrum of  $[\text{Ag}_{25-x}\text{Au}_x(\text{DMBT})_{18}]^-$  alloy I.

## Supporting Information 5

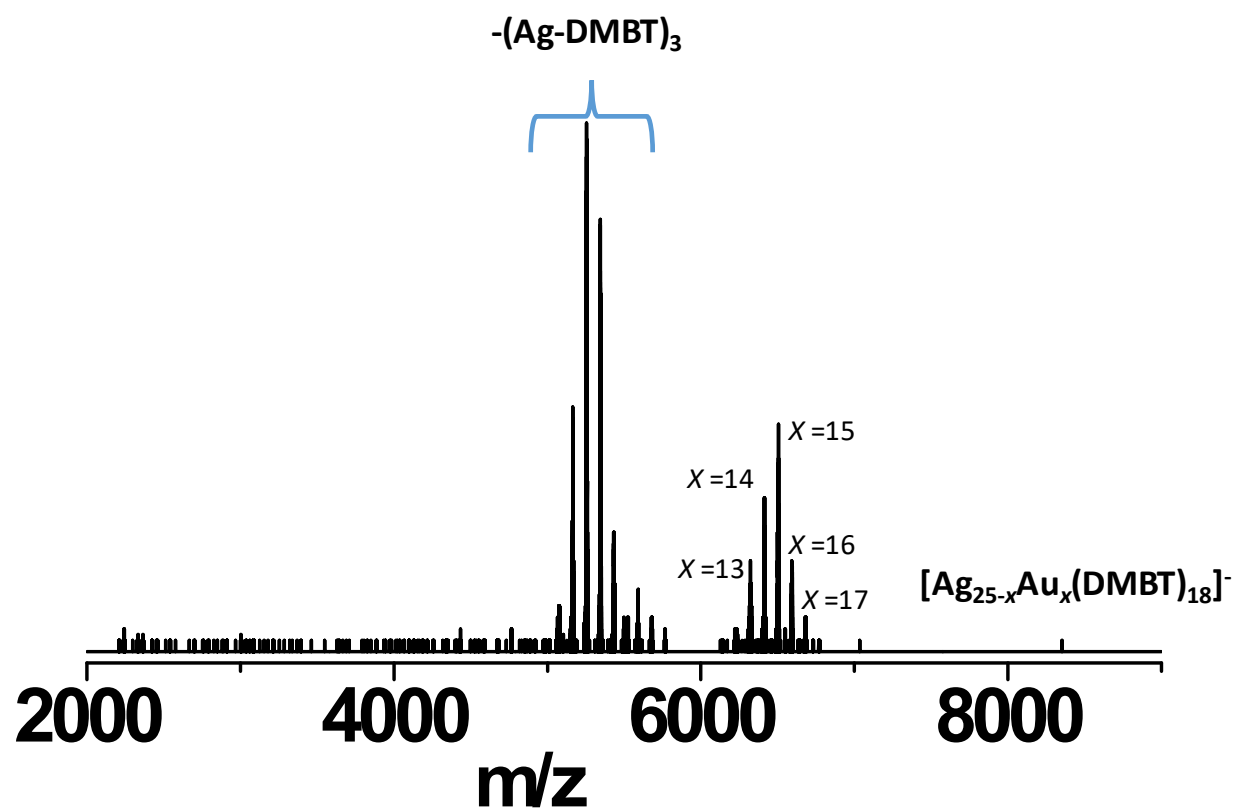

**Figure S5.** Negative ion mode MALDI mass spectrum of  $[\text{Ag}_{25-x}\text{Au}_x(\text{DMBT})_{18}]^-$  alloy II.

## Supporting Information 6

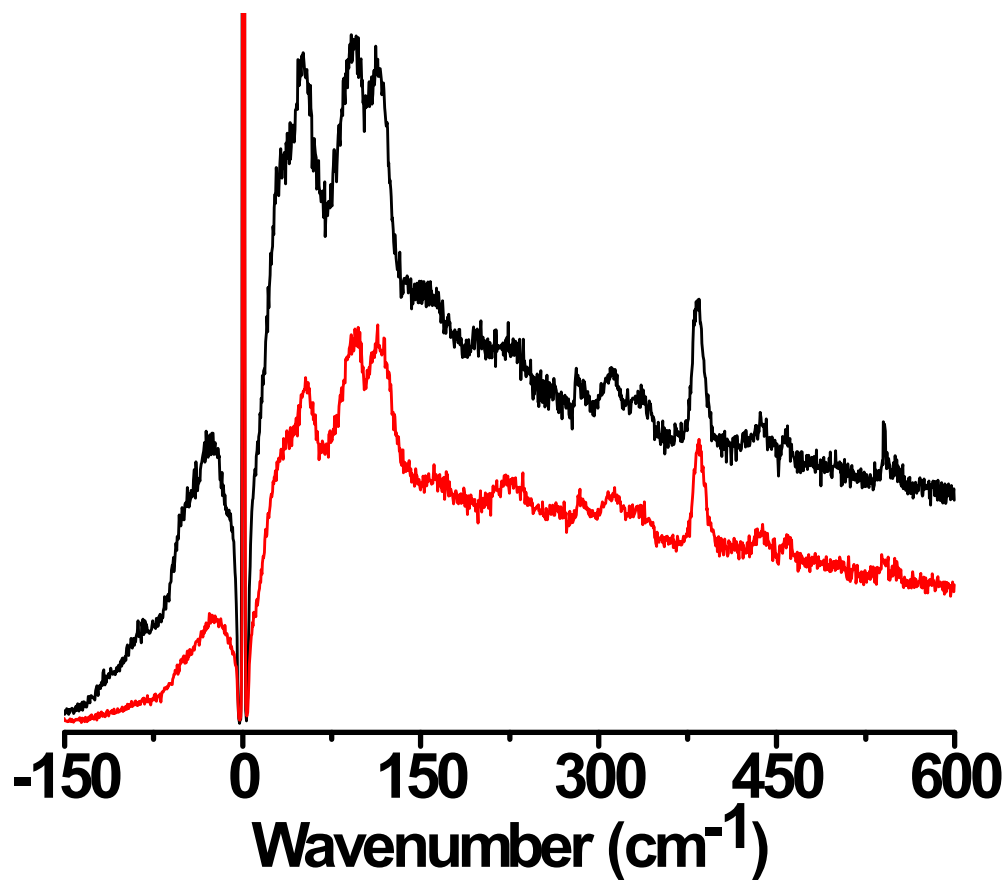

**Figure S6.** Raman spectra of [Ag<sub>25</sub>(DMBT)<sub>18</sub>][PPh<sub>4</sub>] (black trace) and [Ag<sub>24</sub>Au<sub>1</sub>(DMBT)<sub>18</sub>][PPh<sub>4</sub>] (red trace).

## Supporting Information 7

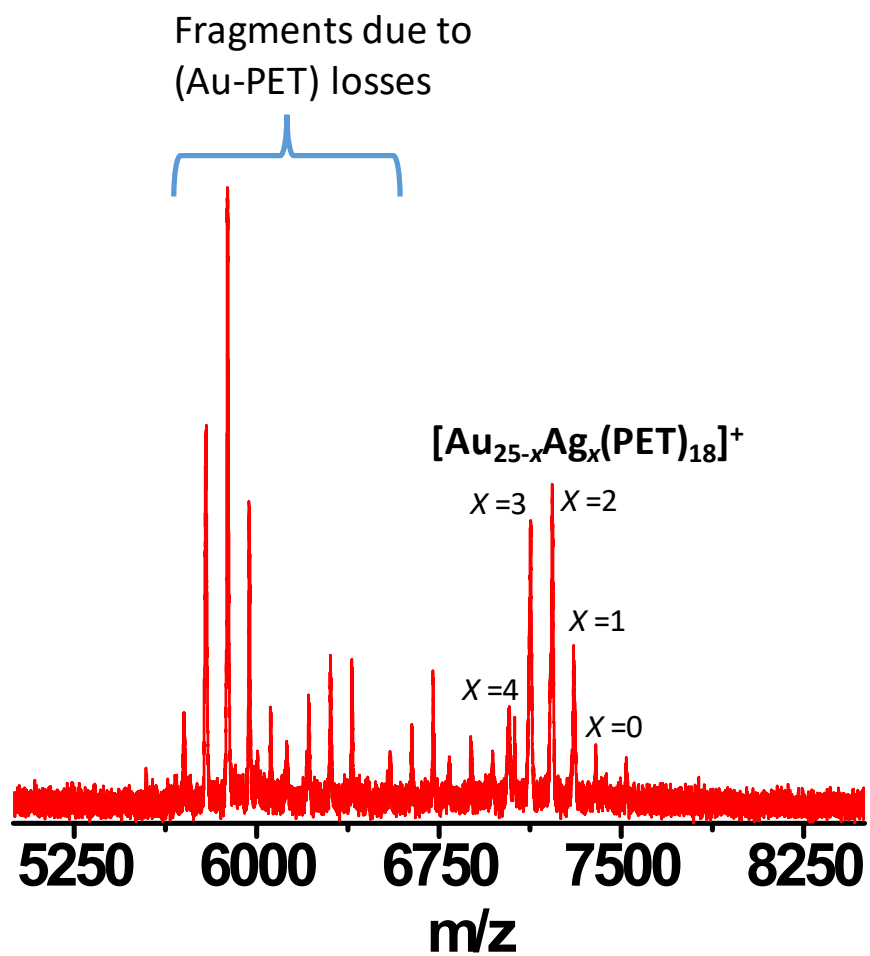

**Figure S7.** Positive ion mode MALDI mass spectrum of  $[\text{Au}_{25-x}\text{Ag}_x(\text{PET})_{18}]^+$ .



## Supporting Information 8

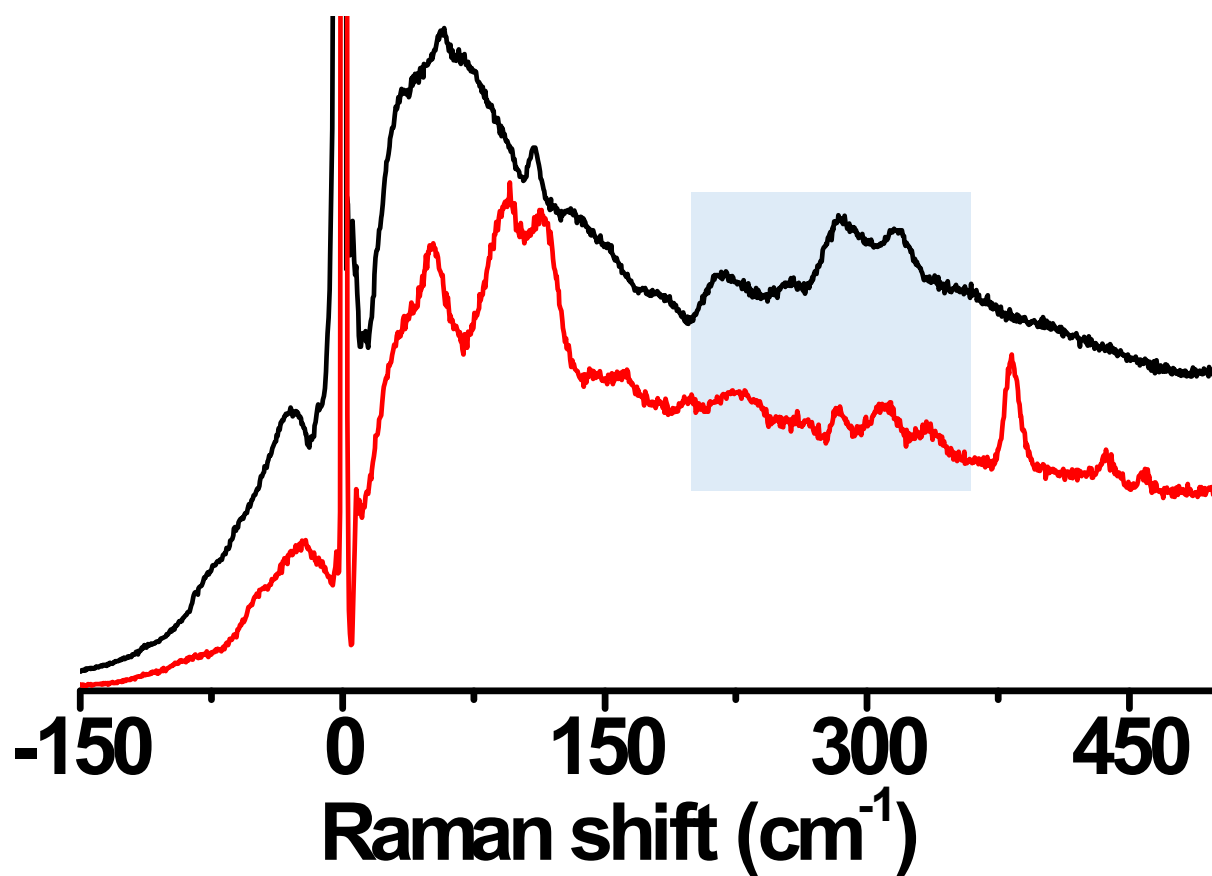

**Figure S8.** A comparison of the Raman spectrum of Au<sub>25</sub>(PET)<sub>18</sub> (black trace) and Ag<sub>25</sub>(DMBT)<sub>18</sub> (red trace). The region highlighted in blue shows the similarity of the high-frequency Raman bands of these two clusters.

## Supporting Information 9

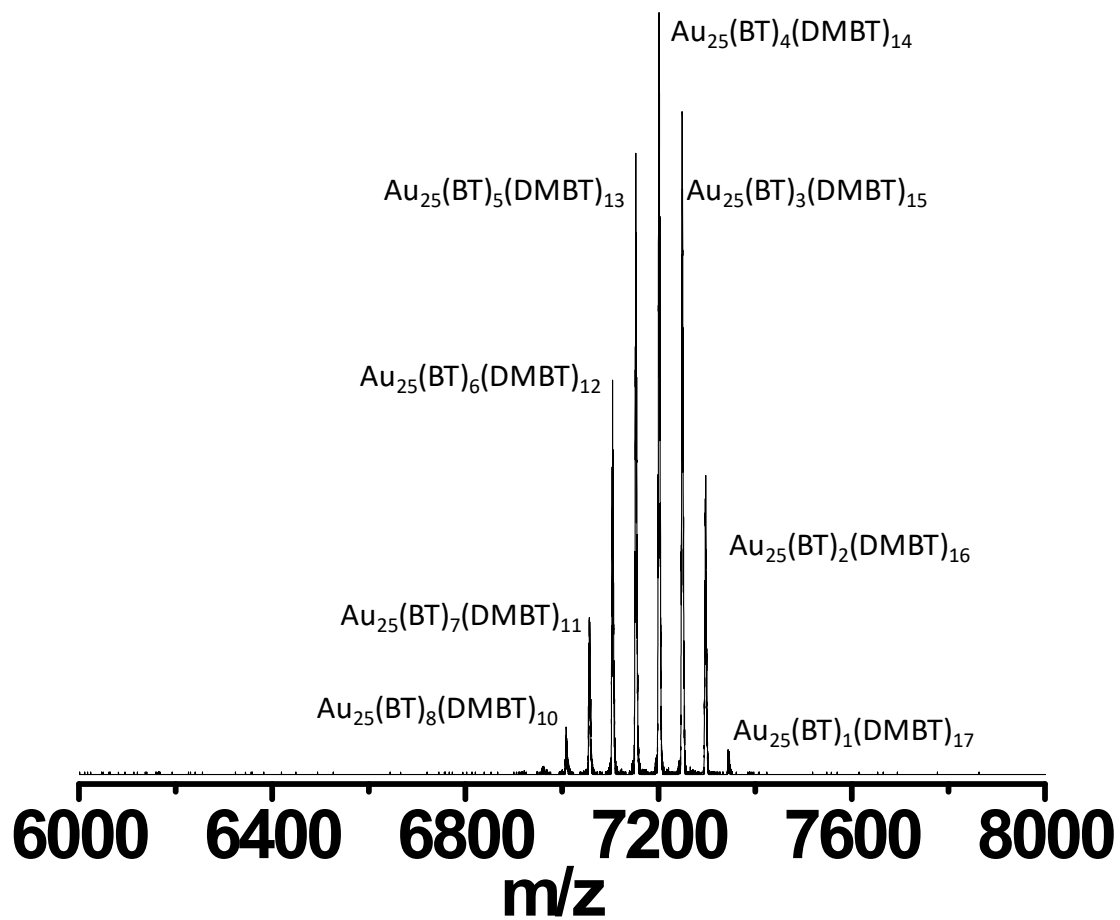

**Figure S9.** Positive ion mode ESI mass spectra of  $\text{Au}_{25}(\text{BT})_{18-x}(\text{DMBT})_x$  clusters.

## Supporting Information 10

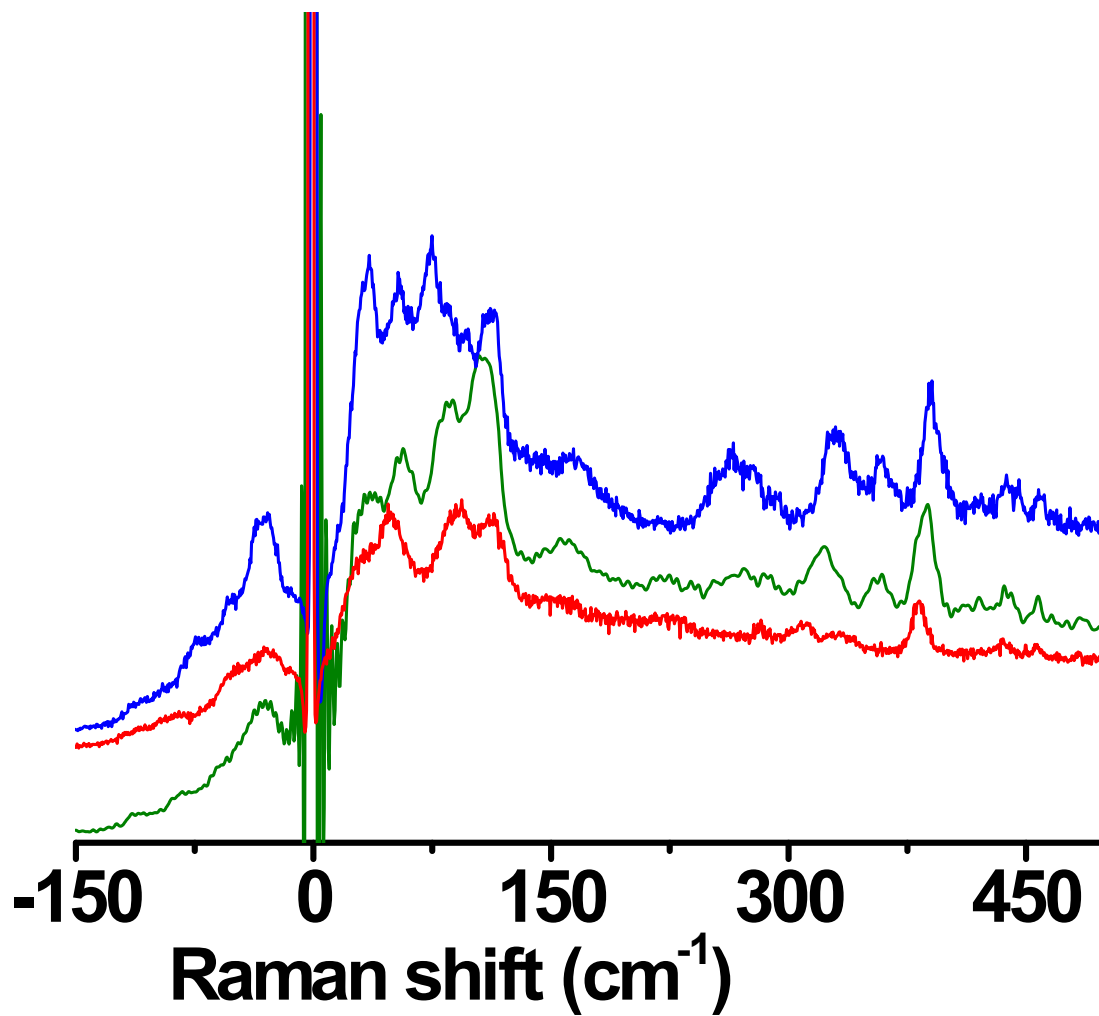

**Figure S10.** Raman spectra of  $[\text{Ag}_{25}(\text{DMBT})_{18}][\text{PPh}_4]$  (red trace),  $\text{Ag}_{25-x}\text{Au}_x$ -Alloy II (green trace) and  $\text{Au}_{25}(\text{BT})_{18-x}(\text{DMBT})_x$  (blue trace).

## Supporting Information 11

### Normal mode analysis

The similarity/differences between the normal modes computed for the Au<sub>25</sub>, Ag<sub>25</sub> and Ag<sub>24</sub>Au clusters were assessed by calculating normal mode overlaps, i.e., scalar products between the normalised nuclear displacement vectors. In addition, the localisation of the mode motion on the inner-cores (i.e., Au<sub>13</sub>, Ag<sub>13</sub> and Ag<sub>12</sub>Au<sub>1</sub>), the (Au<sub>2</sub>S<sub>3</sub>)<sub>6</sub> ligand binding motifs and the remaining C and H atoms was computed using the following formula:

$$L(j,X) = \frac{\sum_{i=1, N^X} S_i^2(j)}{\sum_{i=1, N^{tot}} S_i^2(j)}$$

where  $L(j,X)$  is the localisation of the motion associated with normal mode  $j$  on the molecular fragment  $X$ ,  $S_i^2(j)$  is the square of the nuclear displacement vector  $S$  associated with the  $i$ th atom and the  $j$ th normal mode,  $N^X$  is the number of atoms in fragment  $X$  and  $N^{tot}$  is the total number of atoms in the molecule.

Three different fragments have been considered when computing the localisation of the normal mode motion. Fragment one (F1) represents the Au<sub>13</sub>, Ag<sub>13</sub> and Ag<sub>12</sub>Au inner-cores, fragment two (F2) the (Au<sub>2</sub>S<sub>3</sub>)<sub>6</sub> ligand binding motifs and fragment three (F3) the remaining C and H atoms. Further, there are two important points that need to be made about the localisation of the normal mode motion. First, the localisation of the normal mode motion on fragment F3 will be significantly larger than on the other two fragments combined. This happens because the C and H atoms are lighter and more numerous than the Au/Ag and S atoms. Second, the nuclear displacement vectors associated with the C and H atoms have little relevance for the interpretation of the experimental spectra. This is because the CH<sub>3</sub> group is not only significantly lighter than the DMBT group it has substituted, but it also has a very different geometry. Consequently, when assigning the character of the Raman bands, we only take into account the localisation of the modes on the fragments F1 and F2. For this reason, there are two normal mode overlap values listed in Tables I, II and II (i.e., O1 is obtained by considering the nuclear displacement vectors of all atoms in the nanoclusters, while the O2 is calculated without the nuclear displacement vectors of the C and H atoms.)

Table I lists the results obtained when comparing the modes of the Au<sub>25</sub> and Ag<sub>25</sub> clusters. The analysis was performed for all Au<sub>25</sub> modes with a significant Raman intensity. Furthermore, only the Ag<sub>25</sub> modes that exhibits an overlap larger than 0.6 with the Au<sub>25</sub> modes have been listed in Table I. Tables II and III list the results obtained when comparing the Ag<sub>25</sub> and Ag<sub>24</sub>Au<sub>1</sub> modes

with significant Raman intensities. To illustrate the meaning of the values taken by a given normal mode overlap, in Figure S12 we considered one  $Ag_{25}$  mode from each of the six  $Ag_{25}$  bands (i.e., the most intense mode) together with their corresponding  $Ag_{24}Au_1$  modes and superimposed their nuclear displacement vectors. An overlap of 0.99 (e.g. modes 43 in Figure S12), means that the two modes are 98% ( $0.98 = 0.99^2$ ) similar. In turn, this implies that all nuclear displacement vectors

have very similar directions and magnitudes. Similarly, an overlap of 0.79 (e.g. modes 77 in Figure S12), means that the two modes are only 62% ( $0.62 = 0.79^2$ ) similar. While the two modes can still be considered as similar, their nuclear displacement vectors exhibit clear difference both in direction and magnitude.

## Supporting Information 12

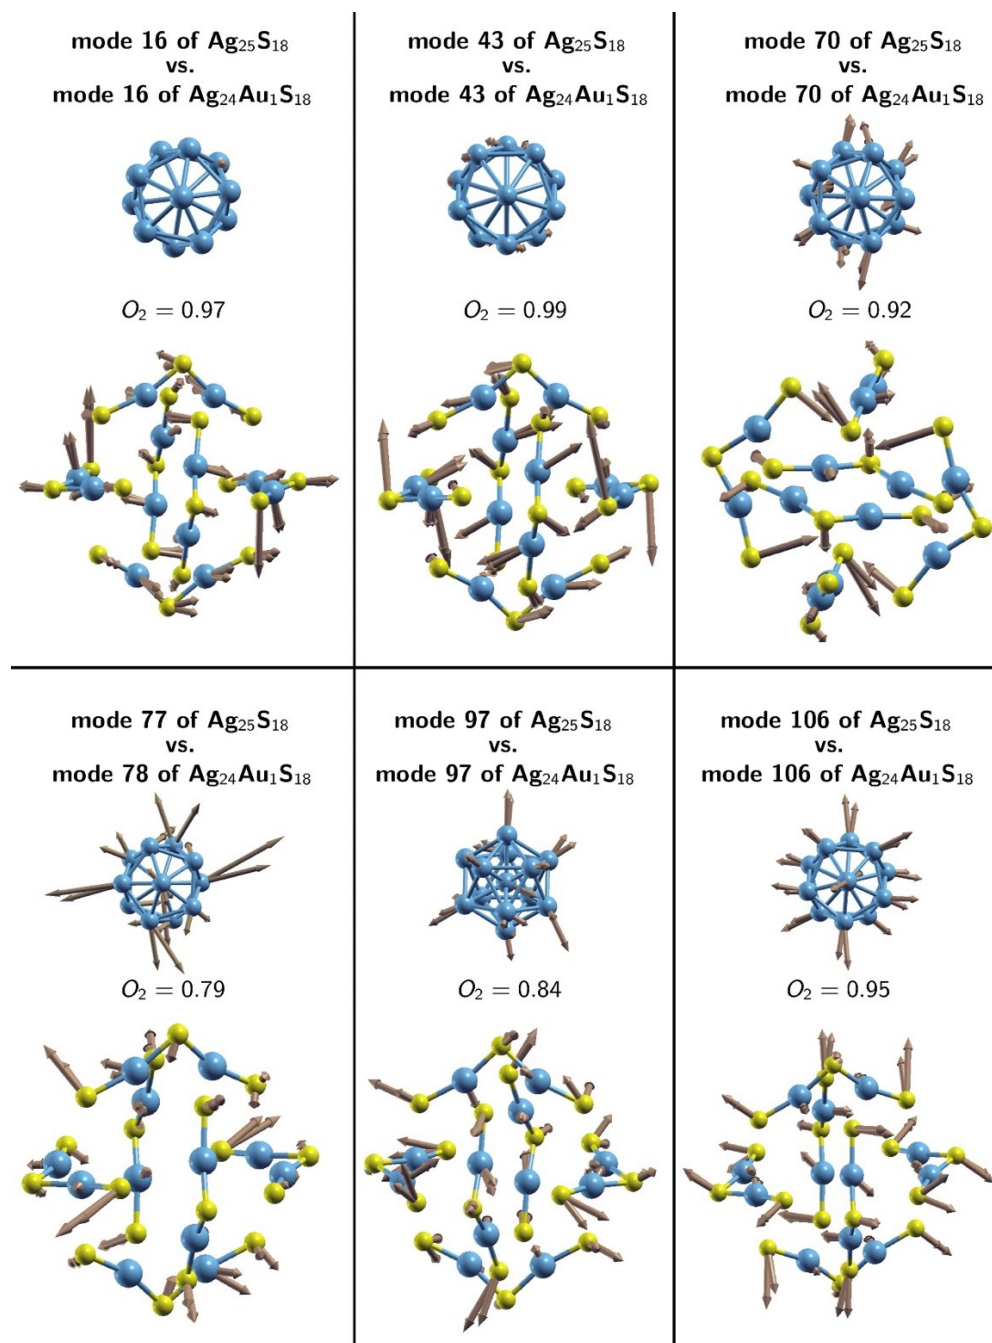

**Figure S11.** Overlaps between the nuclear displacement vectors of the  $\text{Ag}_{25}$  and  $\text{Ag}_{24}\text{Au}_1$  clusters. The  $O_2$  normal mode overlaps were computed using only the nuclear displacement vectors of the atoms in the  $\text{Ag}_{25}\text{S}_{18}$  and  $\text{Ag}_{24}\text{Au}_1\text{S}_{18}$  fragments.

## Supporting Information 13

| Cluster          | NM  | Freq. | Raman  | NM Localisation |      |      | NM overlap |       | Band           |
|------------------|-----|-------|--------|-----------------|------|------|------------|-------|----------------|
|                  |     |       |        | F1              | F2   | F3   | $O_1$      | $O_2$ |                |
| Au <sub>25</sub> | 11  | 22.4  | 2.401  | 3.0             | 16.1 | 80.8 |            |       |                |
| Au <sub>25</sub> | 14  | 25.0  | 2.528  | 7.3             | 19.3 | 73.5 |            |       | A <sub>1</sub> |
| Ag <sub>25</sub> | 7   | 22.8  | 2.776  | 1.6             | 15.4 | 83.0 | 0.64       | 0.47  |                |
| Au <sub>25</sub> | 16  | 25.5  | 2.121  | 4.3             | 17.2 | 78.5 |            |       |                |
| Au <sub>25</sub> | 19  | 28.0  | 2.772  | 4.2             | 27.0 | 68.8 |            |       |                |
| Au <sub>25</sub> | 21  | 28.6  | 3.458  | 4.3             | 25.3 | 70.4 |            |       |                |
| Au <sub>25</sub> | 22  | 28.7  | 2.137  | 5.1             | 25.4 | 69.5 |            |       |                |
| Ag <sub>25</sub> | 14  | 31.7  | 5.912  | 3.2             | 28.4 | 68.5 | 0.45       | 0.64  |                |
| Au <sub>25</sub> | 24  | 30.2  | 1.927  | 5.1             | 21.5 | 73.4 |            |       |                |
| Ag <sub>25</sub> | 7   | 22.8  | 2.776  | 1.6             | 15.4 | 83.0 | -0.68      | 0.41  |                |
| Au <sub>25</sub> | 44  | 47.4  | 2.305  | 4.1             | 12.2 | 83.6 |            |       |                |
| Au <sub>25</sub> | 46  | 48.4  | 4.156  | 2.7             | 9.7  | 87.6 |            |       | shoulder       |
| Au <sub>25</sub> | 48  | 51.5  | 3.942  | 17.3            | 16.9 | 65.8 |            |       | A <sub>2</sub> |
| Ag <sub>25</sub> | 68  | 77.8  | 8.901  | 11.2            | 13.3 | 75.5 | -0.42      | -0.64 |                |
| Au <sub>25</sub> | 54  | 57.2  | 4.520  | 2.8             | 9.2  | 88.0 |            |       |                |
| Ag <sub>25</sub> | 49  | 57.9  | 1.697  | 2.8             | 12.9 | 84.4 | -0.77      | -0.64 | A <sub>2</sub> |
| Au <sub>25</sub> | 55  | 57.5  | 8.036  | 13.6            | 20.1 | 66.4 |            |       |                |
| Au <sub>25</sub> | 58  | 60.0  | 5.761  | 12.1            | 19.0 | 69.0 |            |       |                |
| Au <sub>25</sub> | 59  | 60.5  | 2.997  | 10.3            | 17.0 | 72.6 |            |       |                |
| Au <sub>25</sub> | 61  | 61.2  | 5.926  | 12.3            | 18.8 | 68.9 |            |       |                |
| Au <sub>25</sub> | 64  | 62.9  | 4.616  | 5.6             | 22.3 | 72.1 |            |       |                |
| Au <sub>25</sub> | 65  | 63.8  | 5.055  | 5.8             | 24.8 | 69.4 |            |       |                |
| Au <sub>25</sub> | 67  | 66.9  | 6.488  | 5.3             | 13.3 | 81.3 |            |       |                |
| Ag <sub>25</sub> | 52  | 62.9  | 6.458  | 5.2             | 11.1 | 83.7 | -0.77      | -0.17 |                |
| Ag <sub>25</sub> | 54  | 64.4  | 1.155  | 7.1             | 9.4  | 83.5 | 0.64       | 0.36  |                |
| Au <sub>25</sub> | 68  | 67.6  | 4.268  | 3.9             | 12.5 | 83.6 |            |       |                |
| Ag <sub>25</sub> | 52  | 62.9  | 6.458  | 5.2             | 11.1 | 83.7 | -0.72      | -0.54 |                |
| Au <sub>25</sub> | 83  | 100.7 | 7.330  | 10.0            | 12.7 | 77.4 |            |       |                |
| Au <sub>25</sub> | 84  | 104.6 | 26.793 | 8.5             | 11.4 | 80.1 |            |       | A <sub>3</sub> |
| Ag <sub>25</sub> | 106 | 130.1 | 18.532 | 4.0             | 6.9  | 89.1 | 0.28       | -0.69 |                |

**Table S1.** Comparison of the nuclear displacement vectors of the Au<sub>25</sub> and Ag<sub>25</sub> clusters. Only the modes with significant Raman intensities were considered. All atoms were considered when computing the  $O_1$  overlap. For  $O_2$ , the C and H atoms were neglected. Units: Freq (cm<sup>-1</sup>), Raman (Ang<sup>4</sup>/amu).

## Supporting Information 14

| Cluster             | NM | Freq. | Raman | NM Localisation |      |      | NM overlap |       | Band           |                |
|---------------------|----|-------|-------|-----------------|------|------|------------|-------|----------------|----------------|
|                     |    |       |       | F1              | F2   | F3   | $O_1$      | $O_2$ |                |                |
| Ag <sub>25</sub>    | 13 | 31.1  | 5.739 | 3.6             | 28.3 | 68.1 |            |       | C <sub>1</sub> |                |
| Ag <sub>24</sub> Au | 13 | 31.5  | 5.251 | 3.5             | 28.6 | 67.9 | 0.99       | 0.99  |                |                |
| Ag <sub>25</sub>    | 14 | 31.7  | 5.912 | 3.2             | 28.4 | 68.5 |            |       |                |                |
| Ag <sub>24</sub> Au | 14 | 32.1  | 1.901 | 5.2             | 21.0 | 73.8 | 0.62       | 0.69  |                |                |
| Ag <sub>24</sub> Au | 15 | 32.2  | 4.265 | 4.3             | 24.9 | 70.8 | 0.51       | 0.75  |                |                |
| Ag <sub>25</sub>    | 16 | 32.4  | 5.793 | 2.2             | 20.2 | 77.6 |            |       |                |                |
| Ag <sub>24</sub> Au | 16 | 33.0  | 5.979 | 2.1             | 20.2 | 77.7 | 0.99       | 0.97  |                |                |
| Ag <sub>25</sub>    | 19 | 35.5  | 3.288 | 2.3             | 25.4 | 72.3 |            |       |                |                |
| Ag <sub>24</sub> Au | 19 | 35.8  | 2.452 | 2.7             | 24.9 | 72.4 | 0.99       | 1.00  |                |                |
| Ag <sub>25</sub>    | 20 | 36.3  | 4.388 | 2.2             | 24.7 | 73.1 |            |       |                |                |
| Ag <sub>24</sub> Au | 20 | 37.0  | 4.095 | 1.9             | 25.3 | 72.7 | 0.99       | 0.99  |                |                |
| Ag <sub>25</sub>    | 21 | 37.2  | 2.427 | 1.6             | 22.6 | 75.8 |            |       |                |                |
| Ag <sub>24</sub> Au | 21 | 37.4  | 2.248 | 1.6             | 22.4 | 76.1 | 0.99       | 0.99  |                |                |
| Ag <sub>25</sub>    | 32 | 45.2  | 2.168 | 7.8             | 13.4 | 78.8 |            |       |                | C <sub>2</sub> |
| Ag <sub>24</sub> Au | 32 | 44.9  | 2.420 | 7.5             | 12.0 | 80.4 | -0.97      | -0.96 |                |                |
| Ag <sub>25</sub>    | 33 | 45.7  | 3.491 | 4.8             | 16.7 | 78.5 |            |       |                |                |
| Ag <sub>24</sub> Au | 34 | 45.7  | 2.381 | 5.4             | 19.3 | 75.3 | 0.89       | 0.85  |                |                |
| Ag <sub>25</sub>    | 38 | 47.9  | 3.053 | 7.5             | 20.9 | 71.6 |            |       |                |                |
| Ag <sub>24</sub> Au | 38 | 47.6  | 2.135 | 8.8             | 19.0 | 72.2 | 0.88       | 0.88  |                |                |
| Ag <sub>25</sub>    | 39 | 48.3  | 2.809 | 5.8             | 21.2 | 73.0 |            |       |                |                |
| Ag <sub>24</sub> Au | 39 | 48.6  | 3.515 | 5.9             | 22.8 | 71.3 | 0.91       | 0.91  |                |                |
| Ag <sub>25</sub>    | 40 | 49.6  | 2.990 | 8.2             | 22.0 | 69.8 |            |       |                |                |
| Ag <sub>24</sub> Au | 40 | 50.0  | 3.025 | 6.4             | 21.1 | 72.6 | 0.93       | 0.95  |                |                |
| Ag <sub>25</sub>    | 43 | 51.3  | 4.056 | 2.8             | 16.0 | 81.3 |            |       |                |                |
| Ag <sub>24</sub> Au | 43 | 51.7  | 4.263 | 2.4             | 16.3 | 81.3 | 0.99       | 0.99  |                |                |
| Ag <sub>25</sub>    | 52 | 62.9  | 6.458 | 5.2             | 11.1 | 83.7 |            |       | C <sub>3</sub> |                |
| Ag <sub>24</sub> Au | 52 | 63.1  | 5.629 | 5.0             | 11.0 | 83.9 | -0.99      | -0.99 |                |                |
| Ag <sub>25</sub>    | 57 | 66.9  | 5.333 | 5.7             | 11.3 | 82.9 |            |       |                |                |
| Ag <sub>24</sub> Au | 57 | 67.5  | 3.786 | 5.9             | 11.3 | 82.7 | -0.94      | -0.94 |                |                |
| Ag <sub>25</sub>    | 59 | 68.6  | 3.621 | 6.5             | 9.7  | 83.8 |            |       |                |                |
| Ag <sub>24</sub> Au | 59 | 69.2  | 3.786 | 5.8             | 9.6  | 84.6 | 0.97       | 0.96  |                |                |
| Ag <sub>25</sub>    | 60 | 69.8  | 6.092 | 11.8            | 11.5 | 76.7 |            |       |                |                |
| Ag <sub>24</sub> Au | 60 | 70.5  | 4.996 | 12.3            | 10.3 | 77.4 | 0.96       | 0.96  |                |                |
| Ag <sub>25</sub>    | 61 | 71.4  | 6.080 | 11.4            | 14.0 | 74.6 |            |       |                |                |
| Ag <sub>24</sub> Au | 62 | 72.3  | 5.857 | 12.8            | 13.5 | 73.7 | -0.56      | -0.79 |                |                |
| Ag <sub>24</sub> Au | 63 | 73.5  | 9.357 | 9.3             | 12.1 | 78.6 | 0.75       | 0.54  |                |                |
| Ag <sub>25</sub>    | 63 | 72.4  | 8.541 | 11.8            | 14.2 | 74.0 |            |       |                |                |
| Ag <sub>24</sub> Au | 63 | 73.5  | 9.357 | 9.3             | 12.1 | 78.6 | -0.82      | -0.77 |                |                |
| Ag <sub>25</sub>    | 64 | 74.8  | 4.820 | 7.1             | 12.0 | 80.9 |            |       |                |                |
| Ag <sub>24</sub> Au | 64 | 75.6  | 9.671 | 7.8             | 12.1 | 80.1 | 0.95       | 0.94  |                |                |
| Ag <sub>25</sub>    | 65 | 75.1  | 9.617 | 10.6            | 12.4 | 77.0 |            |       |                |                |
| Ag <sub>24</sub> Au | 65 | 76.3  | 8.644 | 9.9             | 12.4 | 77.7 | -0.94      | -0.95 |                |                |

**Table S2.** Comparison of the nuclear displacement vectors of the Ag<sub>25</sub> and Ag<sub>24</sub>Au clusters. Only the modes with significant Raman intensities were considered. All atoms were considered when computing the  $O_1$  overlap. For  $O_2$ , the C and H atoms were neglected. Units: Freq (cm<sup>-1</sup>), Raman (Ang<sup>4</sup>/amu).



## Supporting Information 15

| Cluster             | NM  | Freq. | Raman  | NM Localisation |      |      | NM overlap     |                | Band           |
|---------------------|-----|-------|--------|-----------------|------|------|----------------|----------------|----------------|
|                     |     |       |        | F1              | F2   | F3   | O <sub>1</sub> | O <sub>2</sub> |                |
| Ag <sub>25</sub>    | 68  | 77.8  | 8.901  | 11.2            | 13.3 | 75.5 |                |                | C <sub>3</sub> |
| Ag <sub>24</sub> Au | 69  | 78.7  | 5.774  | 15.2            | 14.2 | 70.6 | 0.74           | 0.76           |                |
| Ag <sub>25</sub>    | 70  | 79.0  | 11.005 | 9.2             | 12.7 | 78.1 |                |                |                |
| Ag <sub>24</sub> Au | 70  | 79.2  | 11.196 | 10.0            | 12.8 | 77.3 | 0.95           | 0.92           |                |
| Ag <sub>25</sub>    | 74  | 87.1  | 4.646  | 28.6            | 15.5 | 55.9 |                |                | C <sub>4</sub> |
| Ag <sub>24</sub> Au | 74  | 83.6  | 4.267  | 28.5            | 15.5 | 55.9 | 0.96           | 0.99           |                |
| Ag <sub>25</sub>    | 76  | 91.4  | 17.348 | 6.5             | 7.8  | 85.7 |                |                |                |
| Ag <sub>24</sub> Au | 76  | 92.6  | 11.721 | 6.8             | 7.8  | 85.4 | -0.99          | -0.99          |                |
| Ag <sub>25</sub>    | 77  | 93.9  | 23.957 | 6.3             | 7.7  | 86.1 |                |                |                |
| Ag <sub>24</sub> Au | 78  | 95.9  | 14.072 | 9.1             | 8.3  | 82.6 | 0.95           | 0.79           |                |
| Ag <sub>25</sub>    | 80  | 96.3  | 8.949  | 10.3            | 9.3  | 80.4 |                |                |                |
| Ag <sub>24</sub> Au | 80  | 97.6  | 15.063 | 8.0             | 8.8  | 83.3 | 0.95           | 0.95           |                |
| Ag <sub>25</sub>    | 83  | 101.7 | 3.005  | 7.5             | 6.6  | 85.9 |                |                |                |
| Ag <sub>24</sub> Au | 85  | 102.8 | 1.345  | 8.5             | 7.6  | 84.0 | 0.87           | 0.94           |                |
| Ag <sub>25</sub>    | 84  | 102.2 | 4.021  | 6.6             | 6.7  | 86.7 |                |                |                |
| Ag <sub>24</sub> Au | 83  | 102.1 | 0.187  | 4.3             | 5.1  | 90.6 | -0.74          | -0.39          |                |
| Ag <sub>24</sub> Au | 86  | 102.9 | 0.038  | 5.2             | 5.3  | 89.5 | 0.78           | 0.67           |                |
| Ag <sub>25</sub>    | 88  | 108.4 | 4.022  | 6.1             | 6.0  | 87.9 |                |                | C <sub>5</sub> |
| Ag <sub>24</sub> Au | 88  | 109.9 | 1.629  | 5.6             | 5.8  | 88.6 | 0.97           | 0.96           |                |
| Ag <sub>25</sub>    | 89  | 111.4 | 6.790  | 6.8             | 6.9  | 86.3 |                |                |                |
| Ag <sub>24</sub> Au | 90  | 112.7 | 5.035  | 6.1             | 6.6  | 87.3 | 0.95           | 0.98           |                |
| Ag <sub>25</sub>    | 91  | 113.2 | 3.448  | 3.4             | 4.6  | 92.0 |                |                |                |
| Ag <sub>24</sub> Au | 91  | 113.5 | 3.867  | 3.6             | 4.7  | 91.7 | 0.91           | 0.94           |                |
| Ag <sub>25</sub>    | 95  | 118.8 | 6.605  | 3.2             | 5.4  | 91.4 |                |                |                |
| Ag <sub>24</sub> Au | 95  | 119.3 | 2.005  | 2.8             | 6.5  | 90.7 | -0.85          | -0.87          |                |
| Ag <sub>25</sub>    | 96  | 119.3 | 12.629 | 3.1             | 5.5  | 91.4 |                |                |                |
| Ag <sub>24</sub> Au | 96  | 119.4 | 1.097  | 2.4             | 5.6  | 92.0 | 0.77           | 0.68           |                |
| Ag <sub>25</sub>    | 97  | 119.5 | 12.216 | 3.1             | 5.9  | 91.0 |                |                |                |
| Ag <sub>24</sub> Au | 97  | 120.4 | 29.900 | 2.7             | 6.2  | 91.1 | -0.81          | -0.84          |                |
| Ag <sub>25</sub>    | 100 | 124.2 | 1.735  | 4.2             | 6.3  | 89.5 |                |                | C <sub>6</sub> |
| Ag <sub>24</sub> Au | 100 | 125.4 | 2.135  | 4.4             | 6.2  | 89.4 | 0.97           | 0.98           |                |
| Ag <sub>25</sub>    | 101 | 124.9 | 4.658  | 3.8             | 6.1  | 90.1 |                |                |                |
| Ag <sub>24</sub> Au | 101 | 126.2 | 3.348  | 3.7             | 5.9  | 90.4 | 0.97           | 0.97           |                |
| Ag <sub>25</sub>    | 104 | 127.6 | 5.646  | 2.9             | 5.5  | 91.6 |                |                |                |
| Ag <sub>24</sub> Au | 104 | 129.2 | 3.066  | 2.5             | 4.8  | 92.7 | -0.82          | -0.86          |                |
| Ag <sub>24</sub> Au | 105 | 129.3 | 3.479  | 3.5             | 4.9  | 91.6 | 0.37           | 0.58           |                |
| Ag <sub>25</sub>    | 105 | 127.7 | 5.140  | 4.3             | 5.3  | 90.3 |                |                |                |
| Ag <sub>24</sub> Au | 105 | 129.3 | 3.479  | 3.5             | 4.9  | 91.6 | -0.86          | -0.86          |                |
| Ag <sub>25</sub>    | 106 | 130.1 | 18.532 | 4.0             | 6.9  | 89.1 |                |                |                |
| Ag <sub>24</sub> Au | 106 | 131.9 | 34.278 | 4.4             | 7.5  | 88.2 | 0.93           | 0.95           |                |

**Table S3.** (Table S2 continued) Comparison of the nuclear displacement vectors of the Ag<sub>25</sub> and Ag<sub>24</sub>Au clusters. Only the modes with significant Raman intensities were considered. All atoms were considered when computing the O<sub>1</sub> overlap. For =O<sub>2</sub>, the C and H atoms were neglected. Units: Freq (cm<sup>-1</sup>), Raman (Ang<sup>4</sup>/amu).

## Supporting Information 16

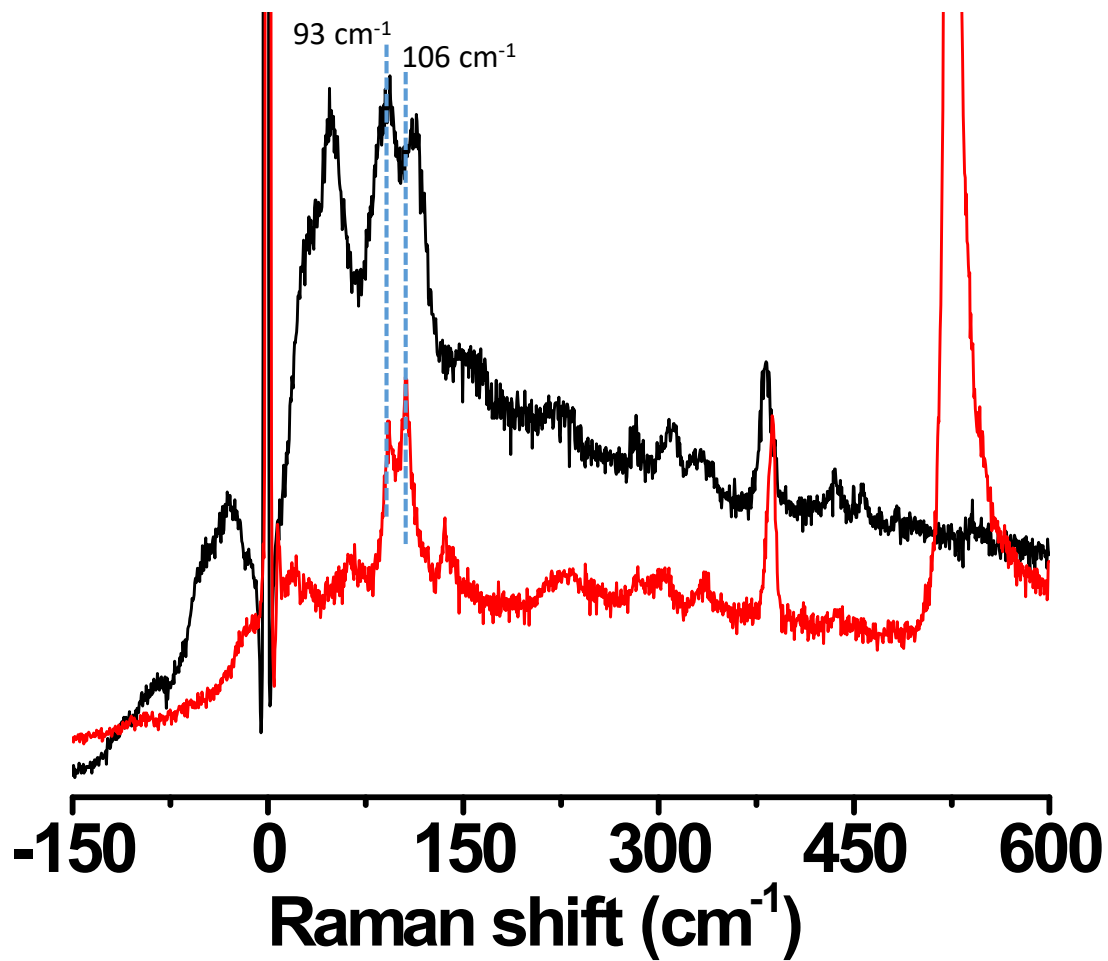

**Figure S12.** Raman spectra of [Ag<sub>25</sub>(DMBT)<sub>18</sub>][PPh<sub>4</sub>] (black trace) and Ag-DMBT thiolates (red trace).

## Supporting Information 17

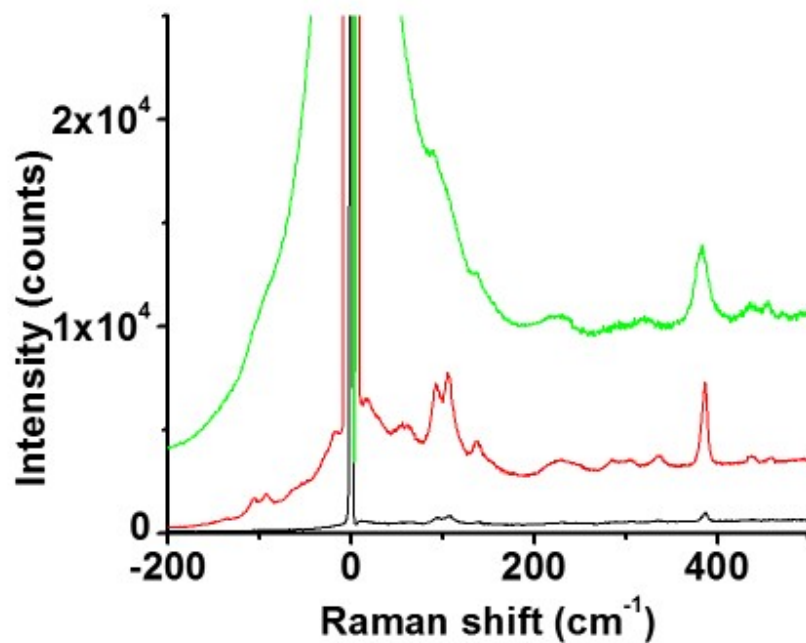

**Figure S13.** Raman spectra of Ag-DMBT thiolates collected at various laser fluencies (black trace, 0.1 %; red trace, 1 % and green trace, 3.2 %). The low frequency and some of the higher frequency bands disappear as the laser fluency increases.

## Supporting Information 18

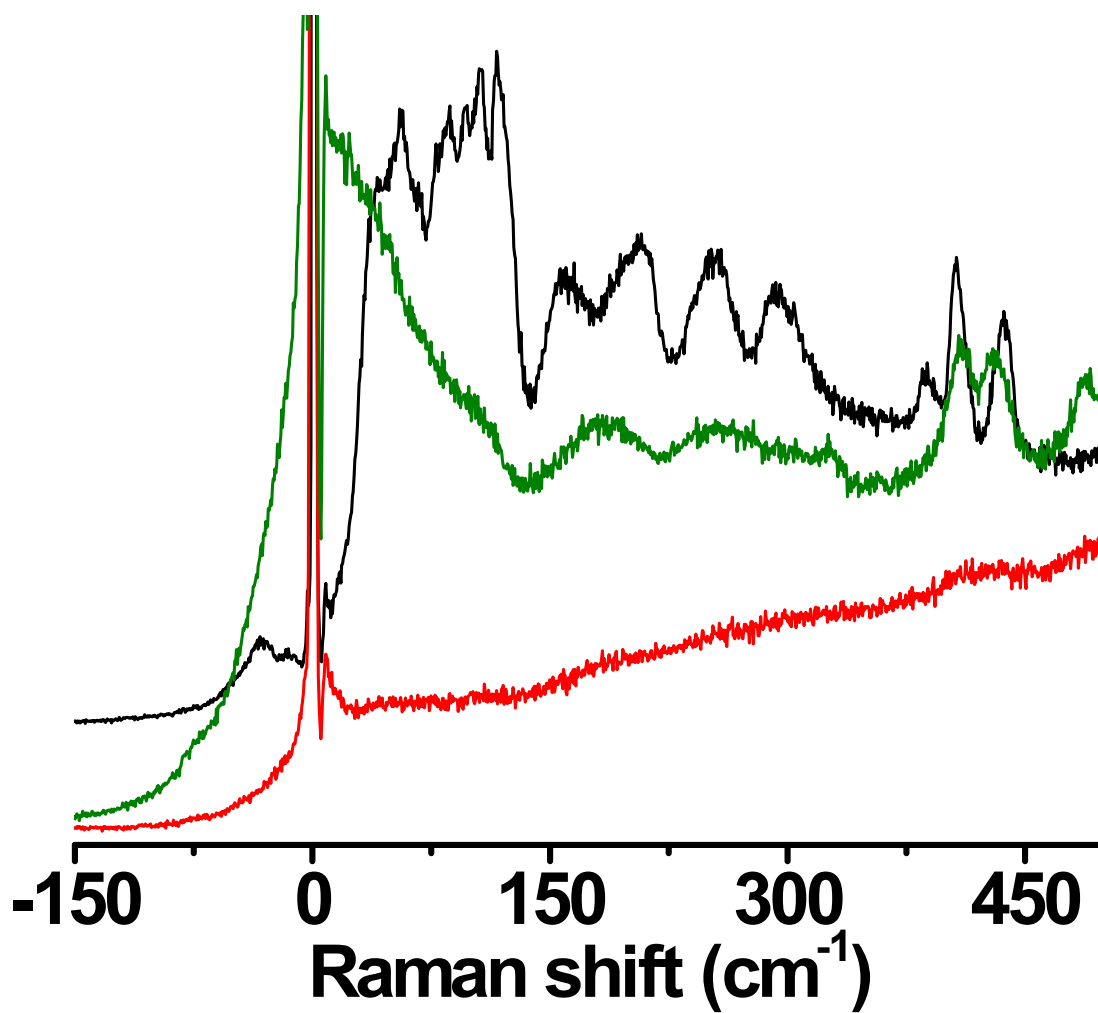

**Figure S14.** Raman spectra of [Ag<sub>29</sub>(BDT)<sub>12</sub>][Na]<sub>3</sub> (black trace), Ag-BDT complexes at 0.1 % (red trace) and at 1 % laser fluencies (green trace). It is evident that the spectra of the metal-thiolate complexes are significantly different apart from the overlap of a few higher frequency bands.

## Supporting Information 19

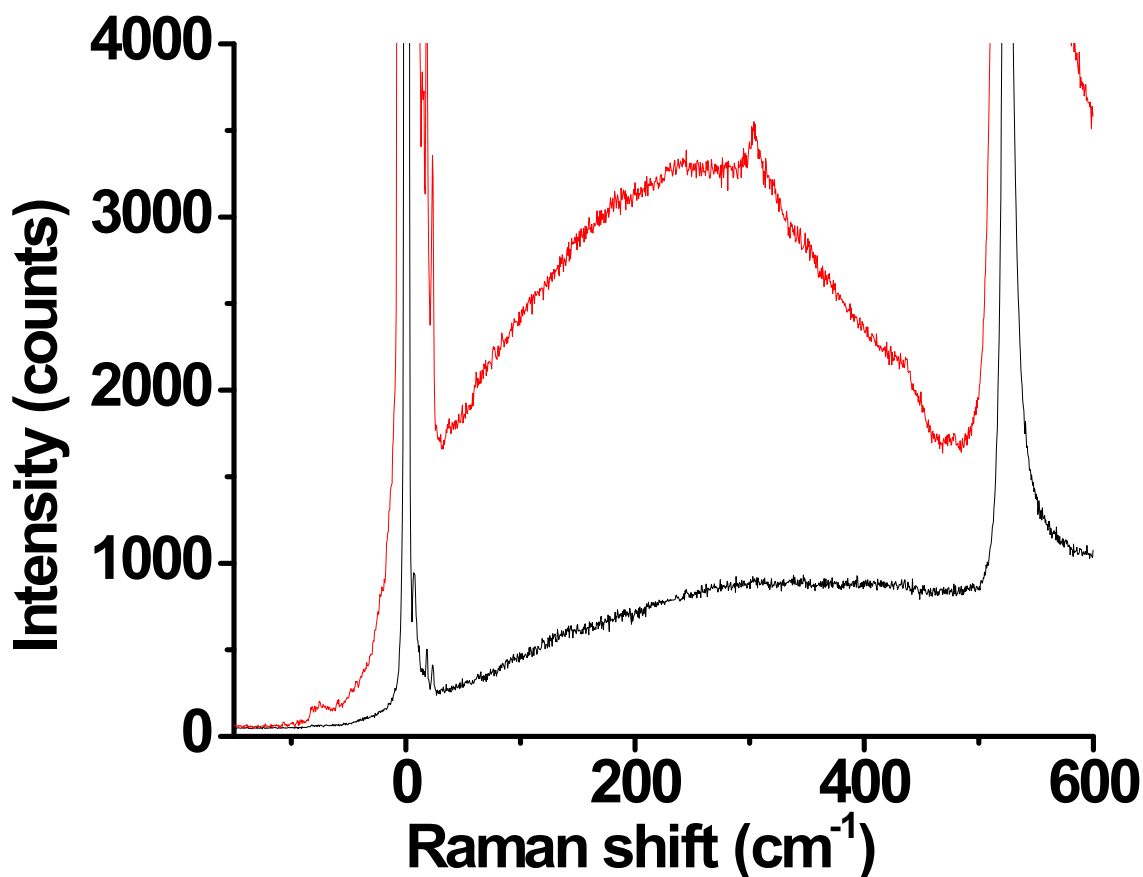

**Figure S15.** Raman spectra of Au-PET complexes at 0.1 % (black trace) and at 1 % laser fluencies (red trace). The intense band at around 520 cm<sup>-1</sup> and a weak band at around 320 cm<sup>-1</sup> are due to the silicon substrate upon which the clusters are drop-casted for Raman measurements. No other bands were observed for the Au-PET thiolate which shows that the spectra of the Au-PET complexes are significantly different from that of Au<sub>25</sub>(PET)<sub>18</sub> clusters (see Figure 1 D).

## Supporting Information 20

Coordinates of the optimized geometry of Au<sub>25</sub>(SCH<sub>3</sub>)<sub>18</sub>

|       |          |          |          |
|-------|----------|----------|----------|
| 1 Au  | -5.9065  | -9.4007  | -12.3961 |
| 2 Au  | -3.8559  | -11.3815 | -12.4220 |
| 3 Au  | -3.5888  | -8.7815  | -13.9353 |
| 4 Au  | -6.4022  | -8.1049  | -14.9044 |
| 5 Au  | -8.2416  | -10.0186 | -13.8930 |
| 6 Au  | -6.8235  | -12.0983 | -12.1882 |
| 7 Au  | -5.5074  | -11.0158 | -14.7103 |
| 8 Au  | -4.6951  | -14.0924 | -13.9303 |
| 9 Au  | -2.4111  | -11.6578 | -15.3407 |
| 10 Au | -3.7992  | -5.9699  | -15.5539 |
| 11 Au | -9.4263  | -7.3038  | -15.4647 |
| 12 Au | -7.7712  | -10.0458 | -17.1106 |
| 13 Au | -10.0543 | -12.3724 | -12.1714 |
| 14 Au | -7.9570  | -7.4201  | -12.3704 |
| 15 Au | -8.2240  | -10.0199 | -10.8567 |
| 16 Au | -5.4107  | -10.6967 | -9.8878  |
| 17 Au | -3.5714  | -8.7830  | -10.8991 |
| 18 Au | -4.9895  | -6.7032  | -12.6041 |
| 19 Au | -6.3055  | -7.7860  | -10.0817 |
| 20 Au | -7.1176  | -4.7092  | -10.8614 |
| 21 Au | -9.4019  | -7.1439  | -9.4514  |
| 22 Au | -8.0136  | -12.8317 | -9.2386  |
| 23 Au | -2.3867  | -11.4972 | -9.3274  |
| 24 Au | -4.0419  | -8.7553  | -7.6815  |
| 25 Au | -1.7587  | -6.4291  | -12.6209 |

|      |          |          |          |
|------|----------|----------|----------|
| 26 S | -1.7876  | -9.3904  | -15.4732 |
| 27 S | -10.3784 | -11.1705 | -14.1687 |
| 28 S | -6.1621  | -11.7503 | -16.9455 |
| 29 S | -9.8864  | -13.7735 | -10.2938 |
| 30 S | -5.6724  | -6.6905  | -16.7625 |
| 31 S | -9.3510  | -8.3665  | -17.5600 |
| 32 S | -9.6864  | -6.0827  | -13.4719 |
| 33 S | -6.4085  | -14.4976 | -12.3818 |
| 34 S | -2.9725  | -13.9368 | -15.5172 |
| 35 S | -10.0261 | -9.4112  | -9.3198  |
| 36 S | -1.4342  | -7.6314  | -10.6239 |
| 37 S | -5.6508  | -7.0508  | -7.8467  |
| 38 S | -1.9265  | -5.0281  | -14.4986 |
| 39 S | -6.1397  | -12.1122 | -8.0304  |
| 40 S | -2.4628  | -10.4352 | -7.2318  |
| 41 S | -2.1262  | -12.7183 | -11.3202 |
| 42 S | -5.4043  | -4.3039  | -12.4098 |
| 43 S | -8.8402  | -4.8650  | -9.2743  |
| 44 C | -11.3058 | -13.3503 | -9.1950  |
| 45 C | -11.5994 | -9.5204  | -10.2733 |
| 46 C | -11.3111 | -6.7060  | -12.8608 |
| 47 C | -10.2427 | -3.9585  | -10.0580 |
| 48 C | -4.0660  | -3.5229  | -11.4107 |
| 49 C | -0.5068  | -5.4512  | -15.5971 |
| 50 C | -0.2136  | -9.2802  | -14.5210 |
| 51 C | -0.8329  | -9.5773  | -7.1349  |
| 52 C | -1.7037  | -6.3516  | -9.3228  |
| 53 C | -6.9611  | -7.6276  | -6.6827  |

|      |          |          |          |
|------|----------|----------|----------|
| 54 C | -7.7468  | -15.2790 | -13.3806 |
| 55 C | -10.1083 | -12.4502 | -15.4697 |
| 56 C | -10.9807 | -9.2250  | -17.6560 |
| 57 C | -6.7411  | -5.1862  | -16.7713 |
| 58 C | -0.5016  | -12.0943 | -11.9309 |
| 59 C | -1.5699  | -14.8427 | -14.7329 |
| 60 C | -4.8519  | -11.1731 | -18.1094 |
| 61 C | -5.0708  | -13.6164 | -8.0234  |
| 62 H | -11.2240 | -13.9744 | -8.2973  |
| 63 H | -11.2798 | -12.2942 | -8.9100  |
| 64 H | -12.2354 | -13.5816 | -9.7278  |
| 65 H | -11.7875 | -10.5807 | -10.4861 |
| 66 H | -12.4101 | -9.1054  | -9.6619  |
| 67 H | -11.5260 | -8.9792  | -11.2191 |
| 68 H | -11.3699 | -6.4963  | -11.7846 |
| 69 H | -12.1104 | -6.1774  | -13.3947 |
| 70 H | -11.4034 | -7.7826  | -13.0309 |
| 71 H | -10.0009 | -2.8894  | -10.0319 |
| 72 H | -10.3832 | -4.2774  | -11.0954 |
| 73 H | -11.1478 | -4.1516  | -9.4703  |
| 74 H | -3.1580  | -3.5090  | -12.0253 |
| 75 H | -4.3712  | -2.4979  | -11.1676 |
| 76 H | -3.8832  | -4.0832  | -10.4897 |
| 77 H | -0.5886  | -4.8271  | -16.4949 |
| 78 H | 0.4226   | -5.2197  | -15.0641 |
| 79 H | -0.5326  | -6.5073  | -15.8820 |
| 80 H | 0.5968   | -9.6949  | -15.1331 |
| 81 H | -0.0258  | -8.2197  | -14.3086 |



|       |          |          |          |
|-------|----------|----------|----------|
| 82 H  | -0.2858  | -9.8212  | -13.5751 |
| 83 H  | -0.0593  | -10.3420 | -6.9970  |
| 84 H  | -0.6331  | -9.0105  | -8.0499  |
| 85 H  | -0.8538  | -8.9070  | -6.2676  |
| 86 H  | -1.8159  | -6.8706  | -8.3622  |
| 87 H  | -0.8337  | -5.6845  | -9.2998  |
| 88 H  | -2.6147  | -5.7805  | -9.5219  |
| 89 H  | -6.5902  | -7.5060  | -5.6580  |
| 90 H  | -7.8444  | -6.9973  | -6.8434  |
| 91 H  | -7.2183  | -8.6743  | -6.8682  |
| 92 H  | -7.4415  | -16.3039 | -13.6236 |
| 93 H  | -8.6548  | -15.2929 | -12.7659 |
| 94 H  | -7.9299  | -14.7189 | -14.3017 |
| 95 H  | -10.9781 | -13.1177 | -15.4928 |
| 96 H  | -9.9961  | -11.9312 | -16.4303 |
| 97 H  | -9.1972  | -13.0210 | -15.2705 |
| 98 H  | -11.7546 | -8.4605  | -17.7936 |
| 99 H  | -10.9601 | -9.8954  | -18.5231 |
| 100 H | -11.1798 | -9.7917  | -16.7407 |
| 101 H | -6.2950  | -4.4528  | -17.4539 |
| 102 H | -7.7325  | -5.4861  | -17.1328 |
| 103 H | -6.8289  | -4.7609  | -15.7677 |
| 104 H | 0.2978   | -12.6225 | -11.3968 |
| 105 H | -0.4424  | -12.3040 | -13.0071 |
| 106 H | -0.4099  | -11.0176 | -11.7607 |
| 107 H | -1.4297  | -14.5232 | -13.6955 |
| 108 H | -1.8115  | -15.9118 | -14.7584 |
| 109 H | -0.6648  | -14.6497 | -15.3205 |

|     |   |         |          |          |
|-----|---|---------|----------|----------|
| 110 | H | -3.9685 | -11.8033 | -17.9486 |
| 111 | H | -5.2227 | -11.2947 | -19.1341 |
| 112 | H | -4.5949 | -10.1263 | -17.9237 |
| 113 | H | -4.0792 | -13.3165 | -7.6625  |
| 114 | H | -5.5163 | -14.3502 | -7.3409  |
| 115 | H | -4.9838 | -14.0411 | -9.0273  |

Coordinates of the optimized geometry of  $\text{Ag}_{25}(\text{SCH}_3)_{18}$

|    |    |         |          |          |
|----|----|---------|----------|----------|
| 1  | Ag | -5.9064 | -9.4008  | -12.3960 |
| 2  | Ag | -3.8464 | -11.3479 | -12.3940 |
| 3  | Ag | -3.5887 | -8.8014  | -13.9133 |
| 4  | Ag | -6.3317 | -8.0849  | -14.8694 |
| 5  | Ag | -8.2376 | -10.0282 | -13.8735 |
| 6  | Ag | -6.7566 | -12.0978 | -12.2407 |
| 7  | Ag | -5.5401 | -10.9598 | -14.7263 |
| 8  | Ag | -4.7376 | -13.8575 | -13.9235 |
| 9  | Ag | -2.5377 | -11.4601 | -15.2358 |
| 10 | Ag | -3.9173 | -6.1076  | -15.3813 |
| 11 | Ag | -9.2387 | -7.3326  | -15.2833 |
| 12 | Ag | -7.6902 | -9.9611  | -16.9254 |
| 13 | Ag | -9.8450 | -12.2633 | -12.2212 |
| 14 | Ag | -7.9668 | -7.4540  | -12.3979 |
| 15 | Ag | -8.2243 | -10.0001 | -10.8790 |
| 16 | Ag | -5.4815 | -10.7163 | -9.9225  |
| 17 | Ag | -3.5747 | -8.7734  | -10.9192 |
| 18 | Ag | -5.0560 | -6.7038  | -12.5514 |
| 19 | Ag | -6.2726 | -7.8416  | -10.0659 |
| 20 | Ag | -7.0752 | -4.9442  | -10.8682 |

|       |          |          |          |
|-------|----------|----------|----------|
| 21 Ag | -9.2754  | -7.3419  | -9.5562  |
| 22 Ag | -7.8957  | -12.6937 | -9.4108  |
| 23 Ag | -2.5743  | -11.4687 | -9.5091  |
| 24 Ag | -4.1222  | -8.8398  | -7.8672  |
| 25 Ag | -1.9677  | -6.5382  | -12.5714 |
| 26 S  | -1.6434  | -9.2188  | -15.4604 |
| 27 S  | -10.4603 | -11.1295 | -14.2698 |
| 28 S  | -6.2158  | -11.8736 | -16.9597 |
| 29 S  | -9.7883  | -13.8332 | -10.3911 |
| 30 S  | -5.6450  | -6.8035  | -16.9173 |
| 31 S  | -9.3079  | -8.2684  | -17.5085 |
| 32 S  | -9.7349  | -5.9399  | -13.3636 |
| 33 S  | -6.4014  | -14.5809 | -12.3327 |
| 34 S  | -3.0214  | -13.7943 | -15.6211 |
| 35 S  | -10.1697 | -9.5831  | -9.3319  |
| 36 S  | -1.3520  | -7.6721  | -10.5230 |
| 37 S  | -5.5961  | -6.9269  | -7.8331  |
| 38 S  | -2.0244  | -4.9683  | -14.4015 |
| 39 S  | -6.1683  | -11.9975 | -7.8746  |
| 40 S  | -2.5049  | -10.5328 | -7.2839  |
| 41 S  | -2.0782  | -12.8620 | -11.4285 |
| 42 S  | -5.4113  | -4.2207  | -12.4589 |
| 43 S  | -8.7917  | -5.0076  | -9.1709  |
| 44 C  | -11.1893 | -13.3523 | -9.2898  |
| 45 C  | -11.6884 | -9.5979  | -10.3822 |
| 46 C  | -11.3843 | -6.5947  | -12.8487 |
| 47 C  | -10.1919 | -4.0955  | -9.9553  |
| 48 C  | -4.0966  | -3.4521  | -11.4126 |

|      |          |          |          |
|------|----------|----------|----------|
| 49 C | -0.6237  | -5.4494  | -15.5030 |
| 50 C | -0.1247  | -9.2039  | -14.4102 |
| 51 C | -0.8701  | -9.6771  | -7.2495  |
| 52 C | -1.6243  | -6.3639  | -9.2458  |
| 53 C | -6.8837  | -7.4211  | -6.6011  |
| 54 C | -7.7161  | -15.3498 | -13.3789 |
| 55 C | -10.1879 | -12.4378 | -15.5469 |
| 56 C | -10.9425 | -9.1245  | -17.5430 |
| 57 C | -6.7061  | -5.2953  | -17.0572 |
| 58 C | -0.4288  | -12.2070 | -11.9438 |
| 59 C | -1.6212  | -14.7065 | -14.8369 |
| 60 C | -4.9280  | -11.3786 | -18.1910 |
| 61 C | -5.1071  | -13.5055 | -7.7343  |
| 62 H | -11.1383 | -13.9738 | -8.3875  |
| 63 H | -11.1172 | -12.2965 | -9.0033  |
| 64 H | -12.1362 | -13.5403 | -9.8098  |
| 65 H | -11.9963 | -10.6409 | -10.5288 |
| 66 H | -12.4863 | -9.0522  | -9.8638  |
| 67 H | -11.5088 | -9.1442  | -11.3607 |
| 68 H | -11.5232 | -6.4080  | -11.7762 |
| 69 H | -12.1608 | -6.0652  | -13.4146 |
| 70 H | -11.4694 | -7.6687  | -13.0409 |
| 71 H | -9.9828  | -3.0217  | -9.8767  |
| 72 H | -10.2913 | -4.3661  | -11.0132 |
| 73 H | -11.1179 | -4.3276  | -9.4156  |
| 74 H | -3.1865  | -3.3659  | -12.0182 |
| 75 H | -4.4323  | -2.4532  | -11.1084 |
| 76 H | -3.8891  | -4.0513  | -10.5208 |

|       |          |          |          |
|-------|----------|----------|----------|
| 77 H  | -0.6748  | -4.8280  | -16.4054 |
| 78 H  | 0.3234   | -5.2616  | -14.9832 |
| 79 H  | -0.6959  | -6.5053  | -15.7895 |
| 80 H  | 0.6731   | -9.7498  | -14.9285 |
| 81 H  | 0.1834   | -8.1608  | -14.2640 |
| 82 H  | -0.3043  | -9.6573  | -13.4316 |
| 83 H  | -0.0850  | -10.4348 | -7.1375  |
| 84 H  | -0.7015  | -9.1125  | -8.1746  |
| 85 H  | -0.8482  | -8.9996  | -6.3873  |
| 86 H  | -1.5615  | -6.8308  | -8.2550  |
| 87 H  | -0.8419  | -5.6020  | -9.3433  |
| 88 H  | -2.6094  | -5.8992  | -9.3512  |
| 89 H  | -6.4544  | -7.3416  | -5.5952  |
| 90 H  | -7.7265  | -6.7263  | -6.6979  |
| 91 H  | -7.2307  | -8.4450  | -6.7706  |
| 92 H  | -7.3803  | -16.3486 | -13.6831 |
| 93 H  | -8.6262  | -15.4360 | -12.7733 |
| 94 H  | -7.9237  | -14.7506 | -14.2708 |
| 95 H  | -10.9704 | -13.1996 | -15.4495 |
| 96 H  | -10.2504 | -11.9710 | -16.5377 |
| 97 H  | -9.2029  | -12.9026 | -15.4413 |
| 98 H  | -11.7277 | -8.3669  | -17.6549 |
| 99 H  | -10.9642 | -9.8019  | -18.4052 |
| 100 H | -11.1110 | -9.6892  | -16.6179 |
| 101 H | -6.1919  | -4.5662  | -17.6951 |
| 102 H | -7.6540  | -5.5883  | -17.5241 |
| 103 H | -6.9026  | -4.8490  | -16.0777 |
| 104 H | 0.3477   | -12.7365 | -11.3781 |

|     |   |         |          |          |
|-----|---|---------|----------|----------|
| 105 | H | -0.2902 | -12.3937 | -13.0164 |
| 106 | H | -0.3438 | -11.1330 | -11.7516 |
| 107 | H | -1.5217 | -14.4359 | -13.7790 |
| 108 | H | -1.8303 | -15.7803 | -14.9155 |
| 109 | H | -0.6952 | -14.4744 | -15.3766 |
| 110 | H | -4.0851 | -12.0733 | -18.0944 |
| 111 | H | -5.3570 | -11.4577 | -19.1971 |
| 112 | H | -4.5812 | -10.3547 | -18.0211 |
| 113 | H | -4.1593 | -13.2123 | -7.2673  |
| 114 | H | -5.6213 | -14.2346 | -7.0965  |
| 115 | H | -4.9104 | -13.9519 | -8.7138  |

Coordinates of the optimized geometry of  $\text{Ag}_{24}\text{Au}_1(\text{SCH}_3)_{18}$

|    |    |         |          |          |
|----|----|---------|----------|----------|
| 1  | Au | -5.9064 | -9.4007  | -12.3961 |
| 2  | Ag | -3.8425 | -11.3481 | -12.3834 |
| 3  | Ag | -3.5889 | -8.8126  | -13.9223 |
| 4  | Ag | -6.3265 | -8.0807  | -14.8751 |
| 5  | Ag | -8.2429 | -10.0415 | -13.8648 |
| 6  | Ag | -6.7466 | -12.1045 | -12.2391 |
| 7  | Ag | -5.5502 | -10.9601 | -14.7343 |
| 8  | Ag | -4.7409 | -13.8682 | -13.9149 |
| 9  | Ag | -2.5333 | -11.4622 | -15.2359 |
| 10 | Ag | -3.9193 | -6.1125  | -15.3968 |
| 11 | Ag | -9.2476 | -7.3300  | -15.2783 |
| 12 | Ag | -9.8462 | -12.2658 | -12.2219 |

|       |          |          |          |
|-------|----------|----------|----------|
| 14 Ag | -7.9704  | -7.4536  | -12.4087 |
| 15 Ag | -8.2238  | -9.9887  | -10.8699 |
| 16 Ag | -5.4864  | -10.7206 | -9.9170  |
| 17 Ag | -3.5696  | -8.7601  | -10.9277 |
| 18 Ag | -5.0662  | -6.6969  | -12.5531 |
| 19 Ag | -6.2624  | -7.8413  | -10.0579 |
| 20 Ag | -7.0718  | -4.9333  | -10.8771 |
| 21 Ag | -9.2796  | -7.3394  | -9.5562  |
| 22 Ag | -7.8936  | -12.6887 | -9.3954  |
| 23 Ag | -2.5652  | -11.4714 | -9.5140  |
| 24 Ag | -4.1264  | -8.8304  | -7.8631  |
| 25 Ag | -1.9666  | -6.5356  | -12.5705 |
| 26 S  | -1.6411  | -9.2179  | -15.4529 |
| 27 S  | -10.4542 | -11.1378 | -14.2778 |
| 28 S  | -6.1959  | -11.8730 | -16.9670 |
| 29 S  | -9.7854  | -13.8239 | -10.3817 |
| 30 S  | -5.6578  | -6.8077  | -16.9233 |
| 31 S  | -9.3092  | -8.2781  | -17.4985 |
| 32 S  | -9.7269  | -5.9312  | -13.3568 |
| 33 S  | -6.4069  | -14.5812 | -12.3192 |
| 34 S  | -3.0316  | -13.7942 | -15.6192 |
| 35 S  | -10.1717 | -9.5837  | -9.3393  |
| 36 S  | -1.3584  | -7.6635  | -10.5146 |
| 37 S  | -5.6167  | -6.9282  | -7.8253  |
| 38 S  | -2.0272  | -4.9774  | -14.4107 |
| 39 S  | -6.1551  | -11.9934 | -7.8688  |
| 40 S  | -2.5034  | -10.5232 | -7.2939  |
| 41 S  | -2.0859  | -12.8705 | -11.4355 |

|      |          |          |          |
|------|----------|----------|----------|
| 42 S | -5.4059  | -4.2203  | -12.4728 |
| 43 S | -8.7812  | -5.0074  | -9.1729  |
| 44 C | -11.1915 | -13.3471 | -9.2853  |
| 45 C | -11.6782 | -9.6077  | -10.4067 |
| 46 C | -11.3773 | -6.5709  | -12.8263 |
| 47 C | -10.1836 | -4.0835  | -9.9396  |
| 48 C | -4.0864  | -3.4498  | -11.4339 |
| 49 C | -0.6214  | -5.4546  | -15.5072 |
| 50 C | -0.1346  | -9.1939  | -14.3856 |
| 51 C | -0.8693  | -9.6668  | -7.2541  |
| 52 C | -1.6463  | -6.3565  | -9.2396  |
| 53 C | -6.9076  | -7.4425  | -6.6052  |
| 54 C | -7.7263  | -15.3517 | -13.3581 |
| 55 C | -10.1665 | -12.4449 | -15.5528 |
| 56 C | -10.9433 | -9.1346  | -17.5384 |
| 57 C | -6.7181  | -5.2986  | -17.0588 |
| 58 C | -0.4355  | -12.2307 | -11.9662 |
| 59 C | -1.6293  | -14.7181 | -14.8526 |
| 60 C | -4.9048  | -11.3588 | -18.1870 |
| 61 C | -5.0948  | -13.5025 | -7.7331  |
| 62 H | -11.1400 | -13.9662 | -8.3814  |
| 63 H | -11.1255 | -12.2902 | -9.0011  |
| 64 H | -12.1360 | -13.5410 | -9.8075  |
| 65 H | -11.9645 | -10.6533 | -10.5775 |
| 66 H | -12.4916 | -9.0874  | -9.8860  |
| 67 H | -11.4969 | -9.1311  | -11.3738 |
| 68 H | -11.4980 | -6.3979  | -11.7491 |
| 69 H | -12.1538 | -6.0221  | -13.3733 |



|      |          |          |          |
|------|----------|----------|----------|
| 70 H | -11.4804 | -7.6406  | -13.0327 |
| 71 H | -9.9692  | -3.0113  | -9.8543  |
| 72 H | -10.2928 | -4.3454  | -10.9985 |
| 73 H | -11.1064 | -4.3156  | -9.3944  |
| 74 H | -3.1768  | -3.3714  | -12.0413 |
| 75 H | -4.4184  | -2.4476  | -11.1369 |
| 76 H | -3.8803  | -4.0432  | -10.5379 |
| 77 H | -0.6729  | -4.8355  | -16.4111 |
| 78 H | 0.3233   | -5.2606  | -14.9851 |
| 79 H | -0.6875  | -6.5114  | -15.7912 |
| 80 H | 0.6787   | -9.7144  | -14.9062 |
| 81 H | 0.1518   | -8.1483  | -14.2150 |
| 82 H | -0.3159  | -9.6703  | -13.4184 |
| 83 H | -0.0839  | -10.4245 | -7.1442  |
| 84 H | -0.7000  | -9.0983  | -8.1767  |
| 85 H | -0.8490  | -8.9931  | -6.3890  |
| 86 H | -1.6047  | -6.8254  | -8.2486  |
| 87 H | -0.8574  | -5.5995  | -9.3219  |
| 88 H | -2.6262  | -5.8852  | -9.3622  |
| 89 H | -6.4857  | -7.3629  | -5.5962  |
| 90 H | -7.7574  | -6.7565  | -6.7043  |
| 91 H | -7.2419  | -8.4695  | -6.7815  |
| 92 H | -7.3944  | -16.3539 | -13.6552 |
| 93 H | -8.6359  | -15.4301 | -12.7508 |
| 94 H | -7.9324  | -14.7583 | -14.2542 |
| 95 H | -10.9556 | -13.2018 | -15.4705 |
| 96 H | -10.2080 | -11.9760 | -16.5438 |
| 97 H | -9.1867  | -12.9164 | -15.4302 |

|       |          |          |          |
|-------|----------|----------|----------|
| 98 H  | -11.7288 | -8.3769  | -17.6483 |
| 99 H  | -10.9635 | -9.8083  | -18.4035 |
| 100 H | -11.1126 | -9.7031  | -16.6158 |
| 101 H | -6.2081  | -4.5733  | -17.7044 |
| 102 H | -7.6708  | -5.5916  | -17.5160 |
| 103 H | -6.9043  | -4.8481  | -16.0793 |
| 104 H | 0.3410   | -12.7795 | -11.4193 |
| 105 H | -0.3151  | -12.4037 | -13.0433 |
| 106 H | -0.3324  | -11.1610 | -11.7597 |
| 107 H | -1.5201  | -14.4563 | -13.7936 |
| 108 H | -1.8437  | -15.7903 | -14.9379 |
| 109 H | -0.7065  | -14.4860 | -15.3978 |
| 110 H | -4.0552  | -12.0450 | -18.0880 |
| 111 H | -5.3268  | -11.4384 | -19.1961 |
| 112 H | -4.5705  | -10.3319 | -18.0107 |
| 113 H | -4.1421  | -13.2094 | -7.2759  |
| 114 H | -5.6048  | -14.2278 | -7.0875  |
| 115 H | -4.9085  | -13.9531 | -8.7126  |
